# Supplementary material
Source: PubMed Central journal article supplement (PMC8219889)
Supplement: mmc2.pdf [file mmc2.pdf]

## Journal of Hepatology

### CTAT methods

Tables for a “Complete, Transparent, Accurate and Timely account” (CTAT) are now mandatory for all revised submissions. The aim is to enhance the reproducibility of methods.

- Only include the parts relevant to your study
- Refer to the CTAT in the main text as ‘Supplementary CTAT Table’
- Do not add subheadings
- Add as many rows as needed to include all information
- Only include one item per row

**If the CTAT form is not relevant to your study, please outline the reasons why:**

|  |
|--|
|  |
|--|

#### 1.1 Antibodies/ELISA kits\*

| Name   | Citation | Supplier      | Cat no.    | Clone no. |
|--------|----------|---------------|------------|-----------|
| ICAM1  |          | R & D systems | DY720-05   |           |
| vWF    |          | R & D systems | DY2764-05  |           |
| Ang1   |          | elabsciences  | E-EL-H6119 |           |
| Ang2   |          | elabsciences  | E-EL-H0008 |           |
| Vegfr1 |          | elabsciences  | E-EL-H1087 |           |

#### 1.2 Cell lines

| Name | Citation | Supplier | Cat no. | Passage no. | Authentication test method |
|------|----------|----------|---------|-------------|----------------------------|
|      |          |          |         |             |                            |

#### 1.3 Organisms

| Name | Citation | Supplier | Strain | Sex | Age | Overall n number |
|------|----------|----------|--------|-----|-----|------------------|
|      |          |          |        |     |     |                  |

#### 1.4 Sequence based reagents

| Name | Sequence | Supplier |
|------|----------|----------|
|      |          |          |

#### 1.5 Biological samples

| Description    | Source                                                  | Identifier |
|----------------|---------------------------------------------------------|------------|
| Plasma Samples | Blood of Cirrhotic patients (Added 3·2% sodium citrate) | -          |

## 1.6 Deposited data

| Name of repository | Identifier | Link |
|--------------------|------------|------|
|                    |            |      |

## 1.7 Software

| Software name   | Manufacturer                          | Version |
|-----------------|---------------------------------------|---------|
| GraphPad Prism  | GraphPad Software, San Diego, CA, USA | 8.4.3   |
| SPSS Statistics | SPSS Inc., Chicago, IL, USA           | 20.0    |

## 1.8 Other (e.g. drugs, proteins, vectors etc.)

|  |  |  |
|--|--|--|
|  |  |  |
|  |  |  |

## 1.9 Please provide the details of the corresponding methods author for the manuscript:

**Dr. Savneet Kaur**

Assistant Professor, Department of Molecular and Cellular Medicine  
Institute of Liver and Biliary Sciences (ILBS)  
D1, Vasant Kunj, New Delhi 110070  
Email: savykaur@gmail.com, 91-9312199899

## 2.0 Please confirm for randomised controlled trials all versions of the clinical protocol are included in the submission. These will be published online as supplementary information.

|  |
|--|
|  |
|--|
